# Supplementary material
Source: PubMed Central journal article supplement (PMC3197450)
Supplement: supp_mcr220_mcr220supp.pdf [file supp_mcr220_mcr220supp.pdf]

## SUPPLEMENTARY DATA

FIG. S1. Fossil pollen record of *Atherosperma moschatum* (Atherospermataceae) since 150 thousand years ago (kya), with the current distribution of the species shown in grey. Circles indicate the presence of one or more pollen grains of *A. moschatum*.

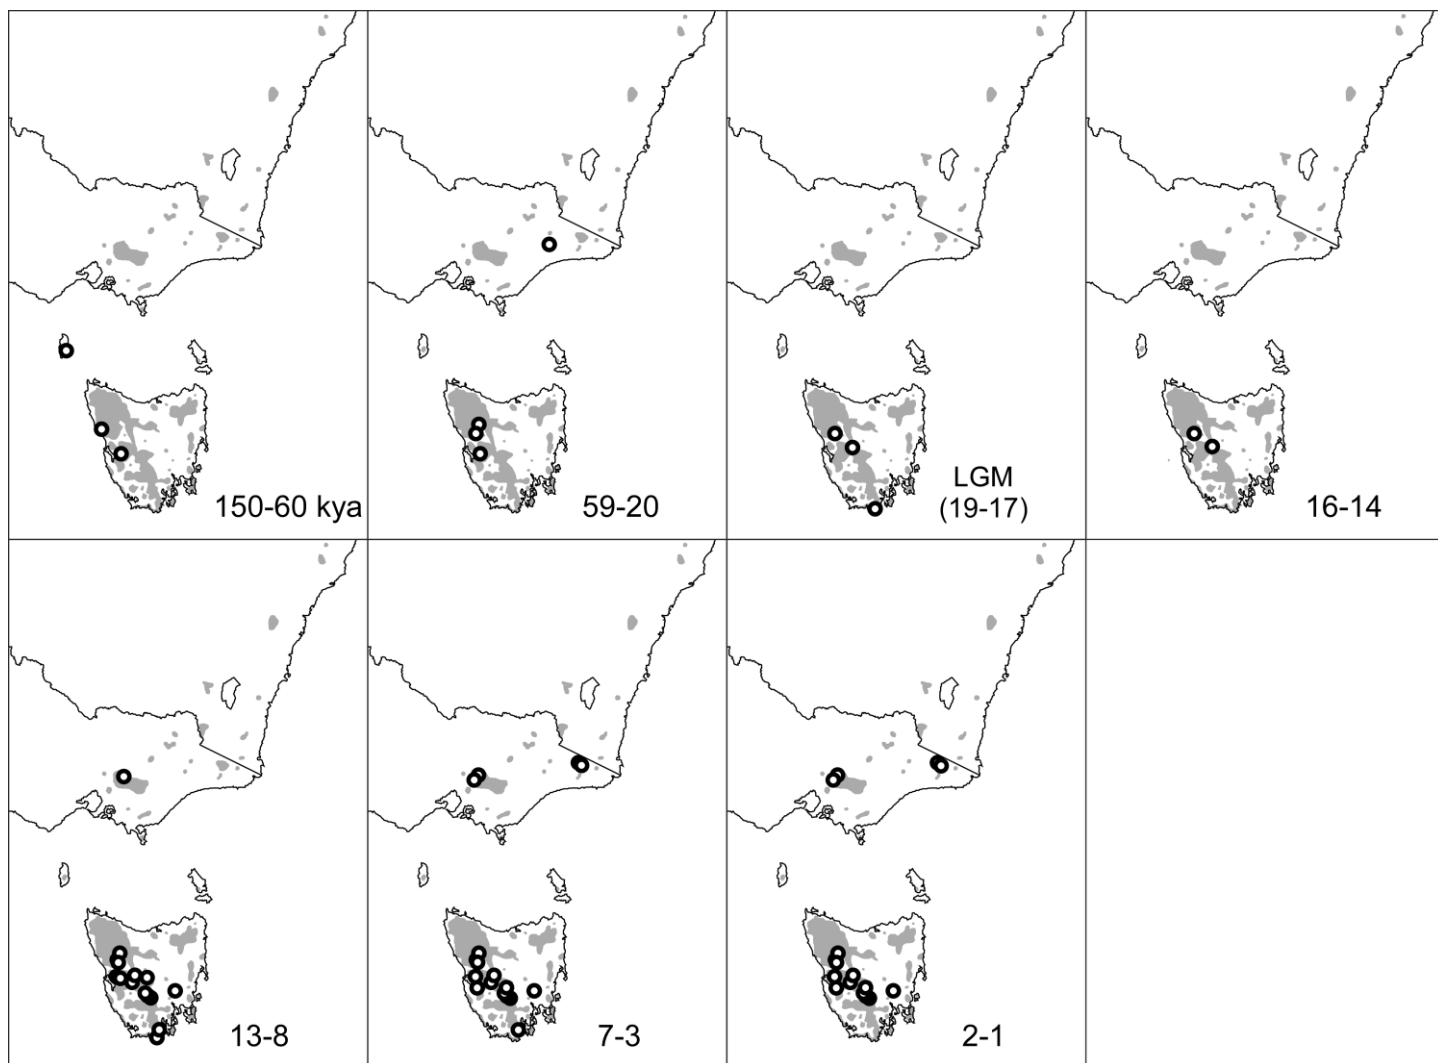

Figure compiled from: Ladd (1979*a,b*), Macphail (1979), Colhoun (1980), Macphail & Colhoun (1985), Colhoun & Van De Geer (1986, 1998), Van De Geer *et al.* (1989), Colhoun *et al.* (1991, 1999), Harle *et al.* (1993, 1999), Mckenzie (1997), Hopf *et al.* (2000), Anker *et al.* (2001), Mckenzie (2002), Kershaw *et al.* (2007), and Porch *et al.* (2009).

### References

- Anker, S.A., Colhoun, E.A., Barton, C.E., Peterson, M. & Barbetti, M. (2001) Holocene vegetation and paleoclimatic and paleomagnetic history from lake Johnston, Tasmania. *Quaternary Research*, **56**, 264–274
- Colhoun, E.A. (1980) Quaternary fluvial deposits from the Pieman Dam site, western Tasmania. *Proceedings of the Royal Society of London – Biological Sciences*, **207**, 355–384

- Colhoun, E.A., Pola, J.S., Barton, C.E. & Heijnis, H. (1999)** Late Pleistocene vegetation and climate history of Lake Selina, western Tasmania. *Quaternary International*, **57–58**, 5–23
- Colhoun, E.A. & Van De Geer, G. (1986)** Holocene to middle last glaciation vegetation history at Tullabardine dam, western Tasmania. *Proceedings – Royal Society of London, Series B*, **229**, 177–207
- Colhoun, E.A., Van De Geer, G. & Fitzsimons, S.J. (1991)** Late glacial and Holocene vegetation history at Governor Bog, King Valley, western Tasmania, Australia. *Journal of Quaternary Science*, **6**, 55–66
- Colhoun, E.A. & Van Der Geer, G. (1998)** Pollen analysis of 0.20 m at Darwin Crater, western Tasmania, Australia. *Int. Project Palaeolimnol. Late Cenozoic Climate*, **11**, 68–89
- Harle, K., Hodgson, D. & Tyler, P. (1999)** Palynological evidence for Holocene palaeoenvironments from the lower Gordon River valley, in the World Heritage Area of southwest Tasmania. *The Holocene*, **9**, 149–162
- Harle, K., Kershaw, A., Macphail, M. & Neyland, M. (1993)** Palaeoecological analysis of an isolated stand of *Nothofagus cunninghamii* (Hook.) Oerst. in eastern Tasmania. *Australian Journal of Ecology*, **18**, 161–170
- Hopf, F.V.L., Colhoun, E.A. & Barton, C.E. (2000)** Late-glacial and Holocene record of vegetation and climate from Cynthia Bay, Lake St Clair, Tasmania. *Journal of Quaternary Science*, **15**, 725–732
- Kershaw, A.P., Mckenzie, G.M., Porch, N., Roberts, R.G., Brown, J., Heijnis, H., Orr, M.L., Jacobsen, G. & Newall, P.R. (2007)** A high-resolution record of vegetation and climate through the last glacial cycle from Caledonia Fen, southeastern highlands of Australia. *Journal of Quaternary Science*, **22**, 481–500
- Ladd, P. (1979a)** Past and present vegetation on the Delegate River in the highlands of eastern Victoria. II. Vegetation and climatic history from 12,000 B.P to present. *Australian Journal of Botany*, **27**, 185–202
- Ladd, P. (1979b)** A short pollen diagram from rainforest in highland eastern Victoria. *Australian Journal of Ecology*, **4**, 229–237
- Macphail, M.K. (1979)** Vegetation and climates in southern Tasmania since the last glaciation. *Quaternary Research*, **11**, 306–341
- Macphail, M.K. & Colhoun, E.A. (1985)** Late last glacial vegetation, climates and fire activity in southwest Tasmania. *Search*, **16**, 43–45
- Mckenzie, G. (2002)** The late Quaternary vegetation history of the south-central highlands of Victoria, Australia. II. Sites below 900 m. *Austral Ecology*, **27**, 32–54
- Mckenzie, G.M. (1997)** The late quaternary vegetation history of the south-central highlands of Victoria, Australia. I. Sites above 900 m. *Australian Journal of Ecology*, **22**, 19–36
- Porch, N., Jordan, G.J., Price, D.M., Barnes, R.W., Macphail, M.K. & Pemberton, M. (2009)** Last interglacial climates of south-eastern Australia: plant and beetle-based reconstructions from Yarra Creek, King Island, Tasmania. *Quaternary Science Reviews*, **28**, 3197–3210
- Van De Geer, G., Fitzsimons, S.J. & Colhoun, E.A. (1989)** Holocene to Middle Last Glaciation vegetation history at Newall Creek, western Tasmania. *New Phytologist*, **111**, 549–558

TABLE S1. Sample collection information and haplotype for all 155 samples of *A. moschatum*

| No. | Sample site                     | Region                | State | Lat. (S) | Long.    | Alt. (masl) | Haplotype | Subspecies                  |
|-----|---------------------------------|-----------------------|-------|----------|----------|-------------|-----------|-----------------------------|
| 1   | Dilgry River                    | Barrington Tops       | NSW   | 31.9164  | 151.4810 | 1418        | H6        | subsp. <i>integrifolium</i> |
| 2   | Dilgry River                    | Barrington Tops       | NSW   | 31.9164  | 151.4810 | 1418        | H6        | subsp. <i>integrifolium</i> |
| 3   | Dilgry River                    | Barrington Tops       | NSW   | 31.9164  | 151.4810 | 1418        | H6        | subsp. <i>integrifolium</i> |
| 4   | Gloucester River                | Barrington Tops       | NSW   | 32.0892  | 151.5961 | 1180        | H6        | subsp. <i>integrifolium</i> |
| 5   | Gloucester River                | Barrington Tops       | NSW   | 32.0892  | 151.5961 | 1180        | H6        | subsp. <i>integrifolium</i> |
| 6   | Gloucester River                | Barrington Tops       | NSW   | 32.0892  | 151.5961 | 1180        | H6        | subsp. <i>integrifolium</i> |
| 7   | Bonnie Doon Falls, Nellies Glen | Blue Mountains        | NSW   | 33.7105  | 150.2895 | 820         | H6        | subsp. <i>integrifolium</i> |
| 8   | Bonnie Doon Falls, Nellies Glen | Blue Mountains        | NSW   | 33.7105  | 150.2895 | 820         | H6        | subsp. <i>integrifolium</i> |
| 9   | Leura Falls (lower)             | Blue Mountains        | NSW   | 33.7235  | 150.3199 | 750         | H6        | subsp. <i>integrifolium</i> |
| 10  | Wentworth Falls                 | Blue Mountains        | NSW   | 33.7280  | 150.3748 | 786         | H6        | subsp. <i>integrifolium</i> |
| 11  | Penance Grove                   | Monga NP              | NSW   | 35.6009  | 149.9133 | 707         | H5        | subsp. <i>integrifolium</i> |
| 12  | Penance Grove                   | Monga NP              | NSW   | 35.6011  | 149.9135 | 705         | H5        | subsp. <i>integrifolium</i> |
| 13  | Penance Grove                   | Monga NP              | NSW   | 35.6009  | 149.9129 | 717         | H5        | subsp. <i>integrifolium</i> |
| 14  | Mount Grundy                    | Riamukka State Forest | NSW   | 31.3455  | 151.6990 | 1185        | H6        | subsp. <i>integrifolium</i> |
| 15  | Tia River                       | Riamukka State Forest | NSW   | 31.3230  | 151.6771 | 1335        | H6        | subsp. <i>integrifolium</i> |
| 16  | Tia River                       | Riamukka State Forest | NSW   | 31.3230  | 151.6771 | 1335        | H6        | subsp. <i>integrifolium</i> |
| 17  | Tia River                       | Riamukka State Forest | NSW   | 31.3230  | 151.6771 | 1335        | H6        | subsp. <i>integrifolium</i> |
| 18  | unnamed tributary of Tia River  | Riamukka State Forest | NSW   | 31.3302  | 151.6757 | 1350        | H6        | subsp. <i>integrifolium</i> |
| 19  | unnamed tributary of Tia River  | Riamukka State Forest | NSW   | 31.3302  | 151.6757 | 1350        | H6        | subsp. <i>integrifolium</i> |

|    |                                      |                       |          |         |          |      |    |                                |
|----|--------------------------------------|-----------------------|----------|---------|----------|------|----|--------------------------------|
| 20 | unnamed tributary of Tia River       | Riamukka State Forest | NSW      | 31.3302 | 151.6757 | 1350 | H6 | subsp.<br><i>integrifolium</i> |
| 21 | Rutherford Creek                     | Brown Mountain        | NSW      | 36.5949 | 149.4420 | 843  | H3 | subsp.<br><i>moschatum</i>     |
| 22 | Rutherford Creek                     | Brown Mountain        | NSW      | 36.5950 | 149.4412 | 841  | H3 | subsp.<br><i>moschatum</i>     |
| 23 | tributary of Leather Barrel Creek    | Kosciusko NP          | NSW      | 36.5318 | 148.1980 | 1150 | H3 | subsp.<br><i>moschatum</i>     |
| 24 | tributary of Leather Barrel Creek    | Kosciusko NP          | NSW      | 36.5318 | 148.1980 | 1150 | H3 | subsp.<br><i>moschatum</i>     |
| 25 | tributary of Leather Barrel Creek    | Kosciusko NP          | NSW      | 36.5318 | 148.1980 | 1150 | H3 | subsp.<br><i>moschatum</i>     |
| 26 | Twins Creek tributary of Geehi River | Kosciusko NP          | NSW      | 36.3230 | 148.2778 | 1040 | H3 | subsp.<br><i>moschatum</i>     |
| 27 | Mount Mangana                        | Bruny Island          | Tasmania | 43.3610 | 147.2869 | 450  | H4 | subsp.<br><i>moschatum</i>     |
| 28 | Howell Falls                         | Dazzler Ranges        | Tasmania | 41.2591 | 146.7730 | 205  | H1 | subsp.<br><i>moschatum</i>     |
| 29 | Howell Gorge                         | Dazzler Ranges        | Tasmania | 41.2756 | 146.7670 | 290  | H1 | subsp.<br><i>moschatum</i>     |
| 30 | Saxons Creek                         | Dazzler Ranges        | Tasmania | 41.2697 | 146.7018 | 143  | H1 | subsp.<br><i>moschatum</i>     |
| 31 | Lookout Hill Rainforest Ledge        | Douglas-Apsley NP     | Tasmania | 41.7393 | 148.2283 | 384  | H1 | subsp.<br><i>moschatum</i>     |
| 32 | Lookout Hill Rainforest Ledge        | Douglas-Apsley NP     | Tasmania | 41.7464 | 148.2223 | 401  | H1 | subsp.<br><i>moschatum</i>     |
| 33 | Big Sassy Creek                      | Eastern Tiers         | Tasmania | 42.1518 | 147.8990 | 482  | H1 | subsp.<br><i>moschatum</i>     |
| 34 | Cygnets River                        | Eastern Tiers         | Tasmania | 41.9440 | 147.8729 | 650  | H1 | subsp.<br><i>moschatum</i>     |
| 35 | Cygnets River-upper reaches          | Eastern Tiers         | Tasmania | 41.9291 | 147.8478 | 785  | H1 | subsp.<br><i>moschatum</i>     |
| 36 | Ferrars Tier nr Lake Leake           | Eastern Tiers         | Tasmania | 41.9992 | 147.8589 | 690  | H1 | subsp.<br><i>moschatum</i>     |
| 37 | Meetus Falls, Cygnets River          | Eastern Tiers         | Tasmania | 41.9515 | 147.8851 | 592  | H1 | subsp.<br><i>moschatum</i>     |
| 38 | Meetus Falls, Cygnets River          | Eastern Tiers         | Tasmania | 41.9526 | 147.8853 | 496  | H1 | subsp.<br><i>moschatum</i>     |

|    |                     |                     |          |         |          |     |    |                            |
|----|---------------------|---------------------|----------|---------|----------|-----|----|----------------------------|
| 39 | Tom Legges Tier     | Eastern Tiers       | Tasmania | 42.1661 | 147.8820 | 605 | H1 | subsp.<br><i>moschatum</i> |
| 40 | Mt Strzelecki       | Flinders Island     | Tasmania | 40.2008 | 148.0723 | 720 | H1 | subsp.<br><i>moschatum</i> |
| 41 | Forestier Peninsula | Forestier Peninsula | Tasmania | 42.9419 | 147.9148 | 231 | H2 | subsp.<br><i>moschatum</i> |
| 42 | Bessels Rd          | Great Western Tiers | Tasmania | 41.7397 | 146.6073 | 804 | H1 | subsp.<br><i>moschatum</i> |
| 43 | Meander River       | Great Western Tiers | Tasmania | 41.7239 | 146.5449 | 645 | H1 | subsp.<br><i>moschatum</i> |
| 44 | Quamby Bluff        | Great Western Tiers | Tasmania | 41.6583 | 146.7002 | 925 | H1 | subsp.<br><i>moschatum</i> |
| 45 | Fraser River        | King Island         | Tasmania | 39.9304 | 144.0194 | 82  | H1 | subsp.<br><i>moschatum</i> |
| 46 | Fraser River        | King Island         | Tasmania | 39.9151 | 144.0190 | 80  | H1 | subsp.<br><i>moschatum</i> |
| 47 | Bishop and Clerk    | Maria Island        | Tasmania | 42.5923 | 148.1143 | 550 | H1 | subsp.<br><i>moschatum</i> |
| 48 | Beckett Creek       | North East Tasmania | Tasmania | 41.4004 | 147.5186 | 371 | H1 | subsp.<br><i>moschatum</i> |
| 49 | Bennies Creek       | North East Tasmania | Tasmania | 41.3487 | 147.3893 | 530 | H1 | subsp.<br><i>moschatum</i> |
| 50 | Blue Tier           | North East Tasmania | Tasmania | 41.1835 | 148.0097 | 748 | H1 | subsp.<br><i>moschatum</i> |
| 51 | Blue Tier           | North East Tasmania | Tasmania | 41.1741 | 148.0110 | 756 | H1 | subsp.<br><i>moschatum</i> |
| 52 | Mt Albert Rd        | North East Tasmania | Tasmania | 41.3493 | 147.9673 | 729 | H1 | subsp.<br><i>moschatum</i> |
| 53 | Nile River          | North East Tasmania | Tasmania | 41.5975 | 147.5598 | 584 | H1 | subsp.<br><i>moschatum</i> |
| 54 | Nile River          | North East Tasmania | Tasmania | 41.5974 | 147.5594 | 585 | H1 | subsp.<br><i>moschatum</i> |
| 55 | St Patricks River   | North East Tasmania | Tasmania | 41.2933 | 147.4134 | 437 | H1 | subsp.<br><i>moschatum</i> |
| 56 | Sunset Ridge        | North East Tasmania | Tasmania | 41.3671 | 147.5385 | 924 | H1 | subsp.<br><i>moschatum</i> |
| 57 | Weavers Creek       | North East Tasmania | Tasmania | 41.4315 | 147.3649 | 656 | H1 | subsp.<br><i>moschatum</i> |
| 58 | NW tributary of     | North East          | Tasmania | 41.2913 | 147.3194 | 448 | H2 | subsp.                     |

|    |                                |                     |          |         |          |     |    |                            |
|----|--------------------------------|---------------------|----------|---------|----------|-----|----|----------------------------|
|    | Patersonia Rivulet             | Tasmania            |          |         |          |     |    | <i>moschatum</i>           |
| 59 | tributary of Black Rivulet     | North East Tasmania | Tasmania | 41.1919 | 147.7921 | 420 | H2 | subsp.<br><i>moschatum</i> |
| 60 | Tatnells Hill                  | Tasman Peninsula    | Tasmania | 43.0873 | 147.9543 | 330 | H1 | subsp.<br><i>moschatum</i> |
| 61 | Tatnells Hill                  | Tasman Peninsula    | Tasmania | 43.0840 | 147.9254 | 455 | H4 | subsp.<br><i>moschatum</i> |
| 62 | Pine Creek                     | Weilangta           | Tasmania | 42.7260 | 147.8773 | 288 | H1 | subsp.<br><i>moschatum</i> |
| 63 | Sandspit Forest Reserve        | Weilangta           | Tasmania | 42.7072 | 147.8420 | 128 | H1 | subsp.<br><i>moschatum</i> |
| 64 | Angel Rain, Franklin River     | Western Tasmania    | Tasmania | 42.2181 | 145.9065 | 316 | H1 | subsp.<br><i>moschatum</i> |
| 65 | Arthur River                   | Western Tasmania    | Tasmania | 41.1149 | 144.9840 | 61  | H1 | subsp.<br><i>moschatum</i> |
| 66 | Blackmans Bend, Franklin River | Western Tasmania    | Tasmania | 42.5173 | 145.7679 | 26  | H1 | subsp.<br><i>moschatum</i> |
| 67 | Camp Cascade, Franklin River   | Western Tasmania    | Tasmania | 42.2854 | 145.7474 | 231 | H1 | subsp.<br><i>moschatum</i> |
| 68 | Cathedral Rock                 | Western Tasmania    | Tasmania | 42.9401 | 147.1918 | 740 | H1 | subsp.<br><i>moschatum</i> |
| 69 | Chestermans Road               | Western Tasmania    | Tasmania | 43.3910 | 146.8580 | 145 | H1 | subsp.<br><i>moschatum</i> |
| 70 | Chestermans Road               | Western Tasmania    | Tasmania | 43.3889 | 146.8651 | 238 | H1 | subsp.<br><i>moschatum</i> |
| 71 | Coruscades, Franklin River     | Western Tasmania    | Tasmania | 42.3293 | 145.7934 | 181 | H1 | subsp.<br><i>moschatum</i> |
| 72 | Creekton Rivulet               | Western Tasmania    | Tasmania | 43.3752 | 146.8933 | 107 | H1 | subsp.<br><i>moschatum</i> |
| 73 | Dennistoun Road                | Western Tasmania    | Tasmania | 42.2573 | 147.1022 | 660 | H1 | subsp.<br><i>moschatum</i> |
| 74 | Donaldson River                | Western Tasmania    | Tasmania | 41.4794 | 145.1026 | 259 | H1 | subsp.<br><i>moschatum</i> |
| 75 | Double Barrel Creek, Lyell Hwy | Western Tasmania    | Tasmania | 42.1927 | 145.9476 | 435 | H1 | subsp.<br><i>moschatum</i> |
| 76 | Endeavor Bay                   | Western Tasmania    | Tasmania | 42.6507 | 145.3474 | 18  | H1 | subsp.<br><i>moschatum</i> |
| 77 | Fergusson Falls                | Western Tasmania    | Tasmania | 41.9031 | 146.1224 | 810 | H1 | subsp.<br><i>moschatum</i> |
| 78 | Finchams Crossing, Franklin    | Western Tasmania    | Tasmania | 42.2419 | 145.7673 | 219 | H1 | subsp.<br><i>moschatum</i> |

|    | River                                         |                     |          |         |          |     |    |                            |
|----|-----------------------------------------------|---------------------|----------|---------|----------|-----|----|----------------------------|
| 79 | Griffiths Creek,<br>Lyell Hwy                 | Western<br>Tasmania | Tasmania | 42.2113 | 146.0923 | 756 | H1 | subsp.<br><i>moschatum</i> |
| 80 | Harry Ryan Creek                              | Western<br>Tasmania | Tasmania | 41.0427 | 145.1245 | 182 | H1 | subsp.<br><i>moschatum</i> |
| 81 | Hastings Cave                                 | Western<br>Tasmania | Tasmania | 43.3855 | 146.8405 | 136 | H1 | subsp.<br><i>moschatum</i> |
| 82 | Hot Springs<br>Creek, nr Hastings<br>Cave     | Western<br>Tasmania | Tasmania | 43.3908 | 146.8504 | 94  | H1 | subsp.<br><i>moschatum</i> |
| 83 | Ironbound Range<br>East                       | Western<br>Tasmania | Tasmania | 43.5127 | 146.4672 | 715 | H1 | subsp.<br><i>moschatum</i> |
| 84 | Ironbound Range<br>East                       | Western<br>Tasmania | Tasmania | 43.5127 | 146.4672 | 715 | H1 | subsp.<br><i>moschatum</i> |
| 85 | King William<br>Creek, Lyell Hwy              | Western<br>Tasmania | Tasmania | 42.2123 | 146.1222 | 791 | H1 | subsp.<br><i>moschatum</i> |
| 86 | Lake Skinner track                            | Western<br>Tasmania | Tasmania | 42.9454 | 146.6994 | 705 | H1 | subsp.<br><i>moschatum</i> |
| 87 | Lake Skinner track                            | Western<br>Tasmania | Tasmania | 42.9447 | 146.6912 | 830 | H1 | subsp.<br><i>moschatum</i> |
| 88 | Lefroy Ridge, nr<br>Pieman River              | Western<br>Tasmania | Tasmania | 41.6777 | 145.0797 | 199 | H1 | subsp.<br><i>moschatum</i> |
| 89 | Liffey Falls State<br>Reserve                 | Western<br>Tasmania | Tasmania | 41.6918 | 146.7578 | 650 | H1 | subsp.<br><i>moschatum</i> |
| 90 | Liffey Falls State<br>Reserve                 | Western<br>Tasmania | Tasmania | 41.7011 | 146.7643 | 580 | H1 | subsp.<br><i>moschatum</i> |
| 91 | Liffey Falls State<br>Reserve-Liffey<br>River | Western<br>Tasmania | Tasmania | 41.7007 | 146.7577 | 520 | H1 | subsp.<br><i>moschatum</i> |
| 92 | Lousia Beach                                  | Western<br>Tasmania | Tasmania | 43.5143 | 146.3603 | 43  | H1 | subsp.<br><i>moschatum</i> |
| 93 | Lousia Beach                                  | Western<br>Tasmania | Tasmania | 43.5143 | 146.3603 | 43  | H1 | subsp.<br><i>moschatum</i> |
| 94 | McDougalls Hill                               | Western<br>Tasmania | Tasmania | 43.5774 | 146.8881 | 12  | H1 | subsp.<br><i>moschatum</i> |
| 95 | Mt Field NP                                   | Western<br>Tasmania | Tasmania | 42.6828 | 146.6508 | 830 | H1 | subsp.<br><i>moschatum</i> |
| 96 | Mt Murchison                                  | Western<br>Tasmania | Tasmania | 41.8405 | 145.6142 | 596 | H1 | subsp.<br><i>moschatum</i> |
| 97 | Mt Wedge track                                | Western<br>Tasmania | Tasmania | 42.8440 | 146.2835 | 655 | H1 | subsp.<br><i>moschatum</i> |

|     |                                  |                  |          |         |          |     |    |                            |
|-----|----------------------------------|------------------|----------|---------|----------|-----|----|----------------------------|
| 98  | Mt Wedge track                   | Western Tasmania | Tasmania | 42.8368 | 146.2794 | 378 | H1 | subsp.<br><i>moschatum</i> |
| 99  | near Boyd Lookout                | Western Tasmania | Tasmania | 42.8154 | 146.3591 | 610 | H1 | subsp.<br><i>moschatum</i> |
| 100 | Nelson Falls track               | Western Tasmania | Tasmania | 42.1038 | 145.7364 | 380 | H1 | subsp.<br><i>moschatum</i> |
| 101 | Newall Creek                     | Western Tasmania | Tasmania | 42.1618 | 145.5392 | 128 | H1 | subsp.<br><i>moschatum</i> |
| 102 | Newlands Cascade, Franklin River | Western Tasmania | Tasmania | 42.4216 | 145.7558 | 124 | H1 | subsp.<br><i>moschatum</i> |
| 103 | nr Edith Creek                   | Western Tasmania | Tasmania | 41.1356 | 144.9514 | 81  | H1 | subsp.<br><i>moschatum</i> |
| 104 | nr Leigh River                   | Western Tasmania | Tasmania | 41.3626 | 145.0305 | 269 | H1 | subsp.<br><i>moschatum</i> |
| 105 | Peegra Rd                        | Western Tasmania | Tasmania | 41.0523 | 145.3117 | 293 | H1 | subsp.<br><i>moschatum</i> |
| 106 | Rafters Basin, Franklin River    | Western Tasmania | Tasmania | 42.3647 | 145.7717 | 113 | H1 | subsp.<br><i>moschatum</i> |
| 107 | road to Corrina, nr Pieman River | Western Tasmania | Tasmania | 41.7137 | 145.0766 | 179 | H1 | subsp.<br><i>moschatum</i> |
| 108 | Serpentine River                 | Western Tasmania | Tasmania | 42.7768 | 145.9811 | 199 | H1 | subsp.<br><i>moschatum</i> |
| 109 | Sir John Falls                   | Western Tasmania | Tasmania | 42.5699 | 145.6898 | 21  | H1 | subsp.<br><i>moschatum</i> |
| 110 | Snake Creek, Lyell Hwy           | Western Tasmania | Tasmania | 42.1148 | 145.7861 | 509 | H1 | subsp.<br><i>moschatum</i> |
| 111 | Snug River                       | Western Tasmania | Tasmania | 43.0850 | 147.2008 | 205 | H1 | subsp.<br><i>moschatum</i> |
| 112 | South Lune Road                  | Western Tasmania | Tasmania | 43.4636 | 146.8580 | 82  | H1 | subsp.<br><i>moschatum</i> |
| 113 | The Longback, nr Donaldson River | Western Tasmania | Tasmania | 41.5639 | 145.0882 | 295 | H1 | subsp.<br><i>moschatum</i> |
| 114 | Trial Harbour Rd                 | Western Tasmania | Tasmania | 41.8989 | 145.2670 | 294 | H1 | subsp.<br><i>moschatum</i> |
| 115 | trib. of Huskisson River         | Western Tasmania | Tasmania | 41.7298 | 145.4911 | 225 | H1 | subsp.<br><i>moschatum</i> |
| 116 | West Coast Range                 | Western Tasmania | Tasmania | 41.9439 | 145.5551 | 560 | H1 | subsp.<br><i>moschatum</i> |
| 117 | Whalers Cove                     | Western Tasmania | Tasmania | 43.2695 | 145.9255 | 7   | H1 | subsp.<br><i>moschatum</i> |



|     |                                          |                   |          |         |          |      |    |                            |
|-----|------------------------------------------|-------------------|----------|---------|----------|------|----|----------------------------|
| 118 | Liffey Falls State Reserve               | Western Tasmania  | Tasmania | 41.6902 | 146.7597 | 668  | H2 | subsp.<br><i>moschatum</i> |
| 119 | Catamaran River                          | Western Tasmania  | Tasmania | 43.5583 | 146.8886 | 14   | H4 | subsp.<br><i>moschatum</i> |
| 120 | Christmas Cove                           | Western Tasmania  | Tasmania | 42.7240 | 145.3915 | 20   | H4 | subsp.<br><i>moschatum</i> |
| 121 | Cockle Creek                             | Western Tasmania  | Tasmania | 43.5797 | 146.8993 | 2    | H4 | subsp.<br><i>moschatum</i> |
| 122 | Cowrie Beach                             | Western Tasmania  | Tasmania | 42.9725 | 145.5580 | 22   | H4 | subsp.<br><i>moschatum</i> |
| 123 | Creepy Crawly                            | Western Tasmania  | Tasmania | 42.8325 | 146.3848 | 589  | H4 | subsp.<br><i>moschatum</i> |
| 124 | Florentine Road                          | Western Tasmania  | Tasmania | 42.7179 | 146.5081 | 482  | H4 | subsp.<br><i>moschatum</i> |
| 125 | Gorilla Ridge                            | Western Tasmania  | Tasmania | 43.2892 | 146.4506 | 620  | H4 | subsp.<br><i>moschatum</i> |
| 126 | Griffiths Creek, Lyell Hwy               | Western Tasmania  | Tasmania | 42.2126 | 146.0919 | 779  | H4 | subsp.<br><i>moschatum</i> |
| 127 | Lake Dobson                              | Western Tasmania  | Tasmania | 42.6826 | 146.5905 | 1034 | H4 | subsp.<br><i>moschatum</i> |
| 128 | Mulcahy River                            | Western Tasmania  | Tasmania | 43.1070 | 145.7157 | 22   | H4 | subsp.<br><i>moschatum</i> |
| 129 | near Lake Gordon                         | Western Tasmania  | Tasmania | 42.8112 | 146.2722 | 338  | H4 | subsp.<br><i>moschatum</i> |
| 130 | Russel Falls. Mt Field NP                | Western Tasmania  | Tasmania | 42.6803 | 146.7121 | 180  | H4 | subsp.<br><i>moschatum</i> |
| 131 | Wylds Craig eastern slope                | Western Tasmania  | Tasmania | 42.4704 | 146.4084 | 910  | H4 | subsp.<br><i>moschatum</i> |
| 132 | Wylds Craig track                        | Western Tasmania  | Tasmania | 42.4915 | 146.4342 | 605  | H4 | subsp.<br><i>moschatum</i> |
| 133 | Archeron River, nr Archeron Gap          | Central Highlands | Victoria | 37.6694 | 145.7407 | 796  | H3 | subsp.<br><i>moschatum</i> |
| 134 | Archeron Way, nr Somers Park             | Central Highlands | Victoria | 37.6360 | 145.7132 | 575  | H3 | subsp.<br><i>moschatum</i> |
| 135 | Boobyalla Saddle                         | Central Highlands | Victoria | 37.6868 | 145.7164 | 819  | H3 | subsp.<br><i>moschatum</i> |
| 136 | Cameron Cascade                          | Central Highlands | Victoria | 37.5269 | 145.8503 | 1085 | H3 | subsp.<br><i>moschatum</i> |
| 137 | headwaters of Hope Creek, East Tanjil Rd | Central Highlands | Victoria | 37.8487 | 146.2526 | 1218 | H3 | subsp.<br><i>moschatum</i> |

|     |                                                   |                                    |          |         |          |      |    |                            |
|-----|---------------------------------------------------|------------------------------------|----------|---------|----------|------|----|----------------------------|
| 138 | headwaters of Hope Creek, East Tanjil Rd          | Central Highlands                  | Victoria | 37.8460 | 146.2467 | 1141 | H3 | subsp.<br><i>moschatum</i> |
| 139 | Myrrohee                                          | Central Highlands                  | Victoria | 37.7816 | 146.1377 | 1104 | H3 | subsp.<br><i>moschatum</i> |
| 140 | Myrrohee                                          | Central Highlands                  | Victoria | 37.7749 | 146.1412 | 1086 | H3 | subsp.<br><i>moschatum</i> |
| 141 | Snowy Junction, Cumberland Road                   | Central Highlands                  | Victoria | 37.5336 | 145.8351 | 1008 | H3 | subsp.<br><i>moschatum</i> |
| 142 | trib of Cement Creek East Branch, nr Mt Boobyalla | Central Highlands                  | Victoria | 37.7001 | 145.7178 | 811  | H3 | subsp.<br><i>moschatum</i> |
| 143 | Ythan Creek                                       | Central Highlands                  | Victoria | 37.7219 | 145.6831 | 1051 | H3 | subsp.<br><i>moschatum</i> |
| 144 | Sherbrooke                                        | Dandenong Ranges                   | Victoria | 37.8861 | 145.3685 | 352  | H3 | subsp.<br><i>moschatum</i> |
| 145 | Sherbrooke                                        | Dandenong Ranges                   | Victoria | 37.8871 | 145.3682 | 348  | H3 | subsp.<br><i>moschatum</i> |
| 146 | Bonang River                                      | Errinundra Plateau, east Gippsland | Victoria | 37.2093 | 148.7381 | 706  | H3 | subsp.<br><i>moschatum</i> |
| 147 | Bonang River                                      | Errinundra Plateau, east Gippsland | Victoria | 37.2132 | 148.7422 | 705  | H3 | subsp.<br><i>moschatum</i> |
| 148 | Clarksville Rd                                    | Errinundra Plateau, east Gippsland | Victoria | 37.2353 | 148.8886 | 1027 | H3 | subsp.<br><i>moschatum</i> |
| 149 | Goonmirk Rocks                                    | Errinundra Plateau, east Gippsland | Victoria | 37.2763 | 148.8892 | 1199 | H3 | subsp.<br><i>moschatum</i> |
| 150 | Result Creek                                      | Errinundra Plateau, east Gippsland | Victoria | 37.2480 | 148.7865 | 883  | H3 | subsp.<br><i>moschatum</i> |
| 151 | Result Creek                                      | Errinundra Plateau, east Gippsland | Victoria | 37.2434 | 148.7918 | 905  | H3 | subsp.<br><i>moschatum</i> |
| 152 | Tarra Bulga NP, Macks Creek                       | Strzelecki Ranges                  | Victoria | 38.4274 | 146.5694 | 589  | H3 | subsp.<br><i>moschatum</i> |

|     |                                |                       |          |         |          |     |    |                            |
|-----|--------------------------------|-----------------------|----------|---------|----------|-----|----|----------------------------|
| 153 | Tarra Bulga NP,<br>Macks Creek | Strzelecki<br>Ranges  | Victoria | 38.4268 | 146.5685 | 594 | H3 | subsp.<br><i>moschatum</i> |
| 154 | western side of Mt<br>Latrobe  | Wilsons<br>Promontory | Victoria | 39.0009 | 146.3719 | 640 | H3 | subsp.<br><i>moschatum</i> |
| 155 | western side of Mt<br>Latrobe  | Wilsons<br>Promontory | Victoria | 39.0010 | 146.3722 | 649 | H3 | subsp.<br><i>moschatum</i> |

---

TABLE S2. Primer pairs tested in *Atherosperma moschatum* for screening for chloroplast variation

| Fragment           | Forward primer (5'–3') | Reverse primer (3'–5') | Reference |
|--------------------|------------------------|------------------------|-----------|
| <i>atpB-rbcL</i>   | atpB-1                 | rbcL-1                 | 1         |
| K1- <i>matK1</i>   | K1                     | matK1                  | 2         |
| <i>matK6-K2</i>    | matK6                  | K2                     | 2         |
| <i>petN1-psbM</i>  | petN1                  | psbM2R                 | 3         |
| <i>psbM-trnD</i>   | psbM2                  | trnD                   | 3         |
| <i>trnT-trnL</i>   | a                      | b                      | 4         |
| <i>trnL</i> intron | c                      | d                      | 4         |
| <i>trnL-trnF</i>   | e                      | f                      | 4         |

- <sup>1</sup> **Chiang, T., Schaal, B. & Peng, C. (1998)** Universal primers for amplification and sequencing a noncoding spacer between the *atpB* and *rbcL* genes of chloroplast DNA. *Botanical Bulletin of Academia Sinica*, **39**, 245–250.
- <sup>2</sup> **Grivet, D. & Petit, R.J. (2002)** Phylogeography of the common ivy (*Hedera* sp.) in Europe: Genetic differentiation through space and time. *Molecular Ecology*, **11**, 1351–1362.
- <sup>3</sup> **Lee, C. & Wen, J. (2004)** Phylogeny of *Panax* using chloroplast *trnC-trnD* intergenic region and the utility of *trnC-trnD* in interspecific studies of plants. *Molecular Phylogenetics and Evolution*, **31**, 894–903.
- <sup>4</sup> **Taberlet, P., Geilly, L., Pautou, G. & Bouvet, J. (1991)** Universal primers for amplification of three non-coding regions of chloroplast DNA. *Plant Molecular Biology*, **17**, 1105–1109.

TABLE S3. Single nucleotide polymorphisms (SNPs; characters 2, 4, 5, 6 and 8) and simple sequence repeat (SSR) polymorphisms (characters 1, 3 and 7) defining the six chloroplast DNA haplotypes observed in *A. moschatum*, shown in comparison to the most frequent haplotype, H1. Dots indicate congruence with the state in haplotype H1. The states at variable sites in *A. moschatum* are also shown for outgroups, *Laurelia sempervirens*, *Nemuaron vieillardii* and *Daphnandra tenuipes*, with missing data indicated by – in *D. tenuipes*. These outgroup species varied at 137 other sites including 123 SNPs and 14 length variations

|                        | 1                            | 2                     | 3                   | 4                   | 5                   | 6                    | 7                             | 8                             |
|------------------------|------------------------------|-----------------------|---------------------|---------------------|---------------------|----------------------|-------------------------------|-------------------------------|
| Haplotype              | <i>trnT</i> -<br><i>trnL</i> | <i>trnL</i><br>intron | K1-<br><i>matK1</i> | K1-<br><i>matK1</i> | K1-<br><i>matK1</i> | <i>matK6</i> -<br>K2 | <i>petN</i> -<br><i>psbMF</i> | <i>petN</i> -<br><i>psbMR</i> |
| H1 (86)                | A(11)                        | T                     | T(10)               | G                   | C                   | G                    | A(12)                         | A                             |
| H2 (4)                 | .                            | .                     | .                   | .                   | T                   | .                    | .                             | .                             |
| H3 (29)                | .                            | .                     | .                   | .                   | .                   | .                    | A(11)                         | .                             |
| H4 (16)                | .                            | .                     | .                   | .                   | .                   | A                    | .                             | .                             |
| H5 (3)                 | A(10)                        | A                     | T(11)               | .                   | .                   | .                    | .                             | .                             |
| H6 (17)                | .                            | .                     | .                   | T                   | .                   | .                    | .                             | C                             |
| <i>L. sempervirens</i> | A(13)                        | .                     | T(11)               | .                   | T                   | .                    | A(13)                         | .                             |
| <i>N. vieillardii</i>  | .                            | .                     | T(11)               | .                   | .                   | .                    | A(10)                         | .                             |
| <i>D. tenuipes</i>     | A(9)                         | .                     | –                   | –                   | –                   | –                    | –                             | –                             |

TABLE S4A. The aligned length obtained for cpDNA fragments sequenced in *A. moschatum* and their GenBank accession numbers. Size differences for fragments are due to SSR length variations. The fragments in bold did not display chloroplast variation within the subset of 24 of *A. moschatum* samples

| Fragment                  | Aligned sequence length (bp) | GenBank accession number |
|---------------------------|------------------------------|--------------------------|
| <b><i>atpB-rbcL F</i></b> | <b>398</b>                   | <b>FJ861006</b>          |
| <b><i>atpB-rbcL R</i></b> | <b>297</b>                   | <b>FJ861007</b>          |
| <i>K1-matK1</i>           | 614-615                      | FJ860982-FJ860987        |
| <i>matK6-K2</i>           | 779                          | FJ860988-FJ860993        |
| <i>petN-psbM F</i>        | 188-189                      | FJ860994-FJ860999        |
| <i>petN-psbM R</i>        | 678                          | FJ861000-FJ861005        |
| <b><i>psbM-trnD</i></b>   | <b>652</b>                   | <b>FJ861008</b>          |
| <i>trnT-trnL</i>          | 562-563                      | FJ860970-FJ860975        |
| <i>trnL intron</i>        | 470                          | FJ860976-FJ860981        |

TABLE S4B. Genbank accession numbers for outgroups. Sequences for the *K1-matK1*, *petN-psbM F* and *petN-psbM R* sequences were of poor quality for *D. tenuipes*

| Fragment           | <i>L. sempervirens</i> | <i>N. viellardii</i> | <i>D. tenuipes</i> |
|--------------------|------------------------|----------------------|--------------------|
| <i>K1-matK1</i>    | GQ302625               | GQ302626             | –                  |
| <i>matK6-K2</i>    | GQ302627               | GQ302628             | GQ302629           |
| <i>petN-psbM F</i> | GQ302632               | GQ302633             | –                  |
| <i>petN-psbM R</i> | GQ302630               | GQ302631             | –                  |
| <i>trnT-trnL</i>   | GQ302619               | GQ302620             | GQ302621           |
| <i>trnL intron</i> | GQ302622               | GQ302623             | GQ302624           |

TABLE S5. Jukes–Cantor corrected sequence divergences ( $d_{xy}$ ), divergence time (mya) and estimated mutation rates (substitution per site per million years) calibrated using alternative estimates of divergence ages (in millions of years) between *A. moschatum*, *Tasmannia lanceolata* and *Nothofagus cunninghamii*, and outgroup taxa. Calibration points have been chosen to represent high and low values

| Node                                               | $d_{xy}$ ( $\times 10^3$ ) | Divergence Time (mya) | Substitution rate (substitutions $\text{site}^{-1} \text{mya}^{-1}$ ) | Source of calibration                                                 |
|----------------------------------------------------|----------------------------|-----------------------|-----------------------------------------------------------------------|-----------------------------------------------------------------------|
| <i>Atherosperma</i> vs <i>Laurelia</i>             | 29.8                       | 83                    | 1.79                                                                  | Chronogram based on pooled cpDNA data <sup>1</sup>                    |
|                                                    |                            | 44.6                  | 3.34                                                                  | Chronogram based on <i>rbcL</i> data <sup>1</sup>                     |
| <i>Atherosperma</i> vs <i>Nemauron</i>             | 22.7                       | 69.5                  | 1.64                                                                  | Chronogram based on pooled cpDNA data <sup>1</sup>                    |
|                                                    |                            | 20                    | 5.68                                                                  | Chronogram based on <i>rbcL</i> data <sup>1</sup>                     |
| <i>Tasmannia</i> vs <i>Drimys</i>                  | 23.9                       | 93                    | 1.28                                                                  | Chronogram based on ITS data <sup>2</sup>                             |
|                                                    |                            | 80                    | 1.49                                                                  | Chronogram based on ITS and cpDNA data <sup>2</sup>                   |
| <i>Tasmannia</i> vs <i>Pseudowintera</i>           | 24.2                       | 93                    | 1.3                                                                   | Chronogram based on ITS data <sup>2</sup>                             |
|                                                    |                            | 80                    | 1.51                                                                  | Chronogram based on ITS and cpDNA data <sup>2</sup>                   |
| <i>Nothofagus cunninghamii</i> vs <i>N. glauca</i> | 8.4                        | 34                    | 1.23                                                                  | Bayesian relaxed molecular clock (BRMC) estimate of node <sup>3</sup> |
|                                                    |                            | 25                    | 1.68                                                                  | Penalised likelihood estimate of node <sup>3</sup>                    |
| <i>N. cunninghamii</i> vs <i>N. menziesii</i>      | 10.4                       | 27                    | 1.92                                                                  | BRMC estimate of node <sup>3</sup>                                    |
|                                                    |                            | 20                    | 2.6                                                                   | Penalised likelihood estimate of node <sup>3</sup>                    |

<sup>1</sup> Renner (2004)

<sup>2</sup> Marquínez *et al.* (2009)

<sup>3</sup> Knapp *et al.* (2005)

TABLE S6. Chloroplast nucleotide diversity ( $\pi$ ; Nei, 1987) for 29 plant species, including *A. moschatum*. Species that co-occur with *A. moschatum* in south-eastern Australia are shown in bold

| Species                                | Life form   |                | bp <sup>a</sup> | Region ( <i>n</i> ) <sup>b</sup> | $\pi \times 100$<br>(s.d. $\times 100$ ) | Reference                       |
|----------------------------------------|-------------|----------------|-----------------|----------------------------------|------------------------------------------|---------------------------------|
| <i>Lithocarpus formosanus</i>          | tree        | dicot          | 996             | Taiwan (19)                      | 8.074<br>(1.149)                         | Chiang <i>et al.</i><br>(2004)  |
| <i>Pinus luchuensis</i>                | tree        | conifer        | 926             | E Asia (174)                     | 6.345<br>(0.383)                         | Chiang <i>et al.</i><br>(2006)  |
| <i>Lithocarpus dodonaeifolius</i>      | tree        | dicot          | 996             | Taiwan (78)                      | 6.026<br>(0.702)                         | Chiang <i>et al.</i><br>(2004)  |
| <i>Cycas revoluta</i>                  | cycad       | cycad          | 913             | Japan/ E China<br>(307)          | 5.81<br>(0.316)                          | Chiang <i>et al.</i><br>(2009)  |
| <i>Kandelia candel</i>                 | mangrove    | dicot          | 415             | East Asia (202)                  | 2.652<br>(0.526)                         | Chiang <i>et al.</i><br>(2001)  |
| <i>Cycas taitungensis</i>              | cycad       | cycad          | 913             | Taiwan (102)                     | 1.81<br>(0.279)                          | Chiang <i>et al.</i><br>(2009)  |
| <i>Nothofagus pumilio</i>              | tree        | dicot          | 1673            | Chile/ Argentina<br>(194)        | 1.71 (0.83)                              | Mathiasen &<br>Premoli (2009)   |
| <i>Alsophila spinulosa</i>             | tree        | fern           | 739             | SE China (75)                    | 1.13<br>(0.197)                          | Su <i>et al.</i> (2005)         |
| <i>Encelia farinosa</i>                | shrub       | dicot          | 456             | USA and Mexico<br>(310)          | 0.625<br>(0.365)                         | Fehlberg &<br>Ranker (2009)     |
| <i>Platycrater arguta</i>              | shrub       | dicot          | 776             | China and Japan<br>(129)         | 0.475 (–)                                | Qiu <i>et al.</i> (2009)        |
| <i>Hymenaea courbaril</i>              | tree        | dicot          | 1600            | SE Brazil (149)                  | 0.3 (–)                                  | Ramos <i>et al.</i><br>(2009)   |
| <i>Schiedea globosa</i>                | shrub       | dicot          | 724             | Hawaii (59)                      | 0.27 (0.03)                              | Wallace <i>et al.</i><br>(2009) |
| <i>Cunninghamia konishii</i>           | tree        | conifer        | 1888            | Taiwan (64)                      | 0.19<br>(0.067)                          | Hwang <i>et al.</i><br>(2003)   |
| <i>Cunninghamia lanceolata</i>         | tree        | conifer        | 1888            | China (52)                       | 0.176<br>(0.065)                         | Hwang <i>et al.</i><br>(2003)   |
| <b><i>Nothofagus cunninghamii</i></b>  | <b>tree</b> | <b>dicot</b>   | <b>2164</b>     | <b>SE Australia<br/>(213)</b>    | 0.101<br>(0.01)                          | Worth <i>et al.</i><br>(2009)   |
| <i>Castanopsis carlesii</i>            | tree        | dicot          | 1663            | Taiwan (201)                     | 0.095 (–)                                | Cheng <i>et al.</i><br>(2005)   |
| <b><i>Lagarostrobos franklinii</i></b> | <b>tree</b> | <b>conifer</b> | <b>892</b>      | <b>W. Tasmania (96)</b>          | <b>0.093<br/>(0.006)</b>                 | Clark & Carbone<br>(2008)       |
| <i>Microbiota decussata</i>            | shrub       | conifer        | 4357            | far east Russia (48)             | 0.09<br>(0.052)                          | Artyukova <i>et al.</i>         |



|                                      |              |              |             |                           |                          |  |                                        |
|--------------------------------------|--------------|--------------|-------------|---------------------------|--------------------------|--|----------------------------------------|
|                                      |              |              |             |                           |                          |  | (2009)                                 |
| <i>Trochodendron aralioides</i>      | tree         | dicot        | 1102        | S. Japan and Taiwan (95)  | 0.088<br>(0.012)         |  | Huang <i>et al.</i> (2004)             |
| <i>Laurus nobilis</i>                | tree         | dicot        | 2562        | Mediterranean (74)        | 0.081 (–)                |  | Rodriguez-Sanchez <i>et al.</i> (2009) |
| <i>Pseudotsuga menziesii</i>         | tree         | conifer      | 1537        | W North America (219)     | 0.073<br>(0.053)         |  | Gugger <i>et al.</i> (2010)            |
| <b><i>Tasmannia lanceolata</i></b>   | <b>shrub</b> | <b>dicot</b> | <b>3206</b> | <b>SE Australia (244)</b> | <b>0.073<br/>(0.006)</b> |  | Worth <i>et al.</i> (2010)             |
| <i>Cyclobalanopsis glauca</i>        | tree         | dicot        | 1980        | E. Asia (140)             | 0.065 (–)                |  | Huang <i>et al.</i> (2002)             |
| <i>Quercus mongolica</i>             | tree         | dicot        | 4253        | Japan (501)               | 0.055<br>(0.001)         |  | Okaura <i>et al.</i> (2007)            |
| <i>Machilus kusanoi</i>              | tree         | dicot        | 1041        | Taiwan (106)              | 0.051<br>(0.022)         |  | Wu <i>et al.</i> (2006)                |
| <i>Photinia glabra</i>               | tree         | dicot        | 4111        | S Japan (129)             | 0.046 (–)                |  | Aoki <i>et al.</i> (2006)              |
| <i>Machilus thunbergii</i>           | tree         | dicot        | 1031        | Taiwan (110)              | 0.031<br>(0.011)         |  | Wu <i>et al.</i> (2006)                |
| <b><i>Atherosperma moschatum</i></b> | <b>tree</b>  | <b>dicot</b> | <b>3294</b> | <b>SE Australia (155)</b> | <b>0.021<br/>(0.003)</b> |  | This study                             |
| <i>Laurus azorica</i>                | tree         | dicot        | 2562        | Mediterranean (14)        | 0.006 (–)                |  | Rodriguez-Sanchez <i>et al.</i> (2009) |

<sup>a</sup> Combined sequence length (bp), including gaps, obtained per species.

<sup>b</sup> The region from where samples of each species were obtained, with the number of samples investigated per species shown within the brackets.
